# Supplementary material for: A geodatabase of historical landslide events occurred in the highly urbanized volcanic area of Campi Flegrei, Italy
Source: Copernicus journal article supplement (doi:10.5194/essd-2022-267), 2022-08-19
Supplement: Supplementary file [file essd-2022-267-RC1-supplement.pdf]

**In your study entitled 'A geodatabase of historical landslide events occurred in the highly urbanized volcanic area of Campi Flegrei, Italy' is an interesting work that tries to share data on historical landslide events. The data are deposited at 4TU.ResearchData in the form of shpfile and kml. The data are relevant for a community of landslide hazard research, and principally this is a work that justifies publication in ESSD. However, there is some weakness in the way the data are organized and presented. After carefully reading the MS and exploring the attached dataset, I concluded that the way this dataset is presented is insufficient for ESSD in its present form, following the main comments and the specific comments listed below.**

**Main overall concerns:**

**The MS does not fit well into the scope of ESSD in its present form. It lacks to interconnect the data it shares and to show how it is valuable in relation to the Earth's system.**

**The title says '...historical landslide events...' yet It seems to me that sections 4.1 and 4.3 are the ones that truly reflect the title of the MS. Sadly, the other valuable information that was presented in the earlier sections is not tied into the main logical thread of the MS, nor it is demonstrated how vital those may be to be used with historical landslide events.**

**The presentation of the dataset is poor. I am missing at least one table/figure that really gives an overview on the whole dataset that is presented in the MS from the variables side. After all that is in the focus according to the title. The information provided in Sect. 2 is relevant, yet insufficient. The reader must get an overview on the dataset that is presented, before any detail on the measurements is discussed.**

**The study lacks to show how the data it shares is relevant in geological hazard research as one would expect based on the introduction.**

**Specific comments:**

**Abstract**

**The penultimate sentence tries to describe how the dataset could be utilized. This should be much more elaborated on and should be one of the main messages of the abstract.**

**Line 9-10: It would be better to give concrete examples.**

**Line 14: Why is it from 1828 and not earlier? It's already 2022. Why is there no update? Where does the data from? Is it reliable? How to check the quality?**

**Line 20: What do you want to say? What do we get out of this?**

**Line 21-25: I think the purpose of collecting this data should be briefly described in the abstract, and what can we do with this data? Instead of just saying landslides have a significant impact on humans, we need to use the knowledge to deal with them, so what do we get from your data set? Is it just simple data?**

#### **Introduction**

**The Introduction seems as if it was written to another paper. The introduction correctly addresses issues that the dataset at hand could be used to solve. However, when the dataset is presented its values and possible applications are not presented in light of the Introduction.**

**Line 38: What additional risks?**

**Line 41: The importance of the region should be explained internationally, otherwise, there is no comparison, only regional characteristics cannot be promoted globally.**

**Line 52-53: And then what? What are you trying to say? What can we learn from these deaths?**

**Figure 1: Its global location is unknown. It is recommended to add latitude and longitude to add elevation data, now do not know the region's topography, topographic conditions, and the water system's distribution.**

#### **Data and methods**

**Line 111: Why do you choose this time period? What about other times?**

**Line 127: Why is there no comparison with other categories? Would it be accidental to use this category? Then how do we control the quality of data?**

**Line 138: I don't think this is very good statistical software. Why not use R, Python, and Matlab for analysis? How is your significance tested in EXCEL? This leads me to question the availability of data quality.**

**Table 1: It is suggested that the author upload the disaster on that day and year in the form of documents to facilitate readers' visualization.**

**Study area**

**I miss a description of the area's water system, vegetation, soil, and population distribution, as described in the abstract.**

**Line 175: Lack of references.**

**Results**

**Figure 3: Can we get more information by discussing the seasons?**

**Figure 4: I don't see any buildings. Instead, I think it was taken far away from where people live.**

**Figure 5: It is recommended to take the photo from the same angle, choosing the same reference object for easy comparison.**

**Line 210-213: What do we learn from these statistics?**

**Line 249: From what? On what basis?**

**Section 4.3: So, what useful information can we draw from this? In addition, the content order of the result part needs to be modified, and there is no logic among the four results.**

**Figure 10: I suggest adding a trend line for intuitive analysis.**

**Line 277: What do we get from the F-N curve?**

**Line 279: Why choose this time period? It's not in the scope of your dataset.**

**Summary and conclusions**

**Line 293: This should be in the introduction.**

**Line 312: How do you reach this conclusion? It is suggested to add the circulation system and the distribution map of sea level pressure in the article.**

**Line 317: How is this conclusion known? Urban maps of people killed by landslides should be added.**
