# Supplementary material for: A geodatabase of historical landslide events occurred in the highly urbanized volcanic area of Campi Flegrei, Italy
Source: Copernicus journal article supplement (doi:10.5194/essd-2022-267), 2022-08-19
Supplement: Supplementary file [file essd-2022-267-RC3-supplement.pdf]

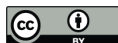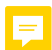

## A geodatabase of historical landslide events occurred in the highly urbanized volcanic area of Campi Flegrei, Italy

Giuseppe Esposito<sup>1</sup>, Fabio Matano<sup>2</sup>

<sup>1</sup>National Research Council - Research Institute for Geo-hydrological Protection (CNR-IRPI), Perugia, 06128, Italy

5 <sup>2</sup>National Research Council - Research Institute of Marine Sciences (CNR-ISMAR), Napoli, 80133, Italy

*Correspondence to:* Giuseppe Esposito ([giuseppe.esposito@irpi.cnr.it](mailto:giuseppe.esposito@irpi.cnr.it))

**Abstract.** The analysis of geological processes threatening people and properties in a populated region should be based on a comprehensive knowledge of historical events and related characteristics. This type of information is essential for predisposing event scenarios, validating prediction models, and planning risk mitigation measures. Such activities may be more complex in some geological settings, where urban settlements are exposed to multi-hazard conditions. This is the case of the densely populated Campi Flegrei volcanic area located in the Campania region, southern Italy. Here, volcanic and seismic hazards are associated with landslides, floods, and coastal erosion, which are playing a relevant role in the landscape modelling. The CAmpI Flegrei LAndslide Geodatabase (CAFLAG), here presented, provides information related to 2302 landslides that occurred in the continental, coastal and insular sectors of this area, during the 1828-2017 time interval. Data associated to the collected landslide events permitted to identify the characteristics of both landslides and of the affected sites. Most of the mass movements consist of rock falls, affecting rocky slopes formed by lithified volcanic rocks, such as lava, tuff or ignimbrite. In addition, rainfall-induced earth and debris slides translating into debris flows or avalanches occur along steep slopes mantled by weakly welded pyroclastic airfall deposits, similarly to other areas of the region. The highest density of landslides results along the coastline where they are contributing to the retreat of coastal cliffs, and along inland slopes exposed towards the western directions. Temporal information shows an increase of the annual frequency of landslides since the '80s, with peaks in the years 1986, 1997, 2005. Regarding the human impact, a total of 127 people lost their life as consequence of 53 fatal landslides occurred in the last century. On the other side, the frequency of deadly events is decreasing since the early 1990s. Despite this, landslides continue to represent a societal risk in the area, requiring therefore to be fully addressed with advanced knowledge and accurate scenarios, which need to be developed by taking into account also the effects of the ongoing climate change. The full database is freely available online at <https://doi.org/10.4121/14440757.v2> (Esposito and Matano, 2021).

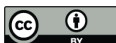

## 1 Introduction

Landslides are among the most effective agents in the landform evolution, also in areas affected by active volcano-tectonic processes. Here, landslides contribute to the dismantling of volcanic edifices by displacing rock masses that form the volcanic flanks (Siebert and Roverato, 2021; Di Traglia et al., 2020; Williams et al., 2019; Walter et al., 2019; Oehler et al., 2004; Ablay and Hürlimann, 2000), involving in some cases the submarine domain of the edifices (Dufresne et al., 2021; Coombs et al., 2007; Masson et al., 2006; Watts et al., 2012; Casalbore et al., 2020; Chiocci et al., 2008). Weakly welded pyroclastic deposits covering volcanic or non-volcanic slopes can be also mobilized in response to rainfall or snow and ice melting, by means of rapid or extremely rapid debris and hyperconcentrated flows resulting in the so-called “lahars” (Lavigne and Thouret, 2002; Capra et al., 2004; Esposito et al., 2017, 2019; Thouret et al., 2020). Lahars may be “syn-eruptive” if they occur simultaneously with volcanic activity, or “secondary” (i.e. “post-eruptive lahars”) when occurring during pauses in volcanic activity or volcano dormancy (Pierson et al., 2014). This poses additional risk for urban settlements already exposed to volcanic processes, also during non-active volcanic phases as demonstrated by several hydrological disasters worldwide.

In Italy, the highly urbanized area of Campi Flegrei (Fig. 1) corresponds to an active volcanic caldera considered among those with the highest volcanic risk in the world (De Natale et al., 2006). For this reason, scientific research on this area has been mostly focused on volcanic and seismic hazards, while relatively poor attention has been paid towards exogenous processes such as landslides, floods, and coastal erosion. As a result, the risk posed by landslides in the Campi Flegrei volcanic area is currently underestimated both among the scientific community and the population.

Landscape of Campi Flegrei has been modelled by landslides since historical times, before the Imperial Roman period (Di Martire et al., 2012). Among the most disastrous recent events, it deserves to mention: 1) the huge tuff collapse occurred along Mt. Echia (Naples) in 1868, causing 60 victims and dozens of injuries (Calcaterra and de Luca Tupputi Schinosa, 2006); 2) the cliff failure occurred along the Maronti beach of the Ischia island in 1978 killing five tourists (Del Prete and Mele, 1999); 3) a series of flow-like mass movements that in 2006 hit some buildings at the footslope of the Monte di Vezzi (Ischia Island), where four people died (De Vita et al., 2007; Di Nocera et al., 2007). Cascini et al. (2008) highlighted that landslides pose a serious societal risk in this area. In fact, several deadly events occurred in the last decades both in the continental and insular sectors, including the islands of Ischia and Procida.

The compilation of an up-to-date and complete landslide database that records location, types and, where known, the date of occurrence of mass movements is the simplest initial approach to any study of landslide hazard (Carrara et al. 1995; Soeters and van Westen 1996; Devoli et al., 2007; Guzzetti et al. 2012). As underlined by Napolitano et al. (2018), information on historical landslides is important to understand the complexities and dynamics of past events, as well as to construct and validate landslide prediction models able to support the designing of appropriate mitigation measures. In the Campi Flegrei



area, a first synthesis of landslide processes was reported by Beneduce et al. (1988) and Calcaterra et al. (2003a). With  
60 reference to the city of Naples, the landslide activity was reconstructed by Calcaterra et al. (2002, 2003a, 2007) and Di  
Martire et al. (2012) by means of archival and bibliographic research, as well as by Miele et al. (2022). Failures and retreat  
rates of coastal cliffs were investigated by Matano et al. (2016), Esposito et al. (2017, 2018a, 2020) and by Caputo et al.  
(2018). Dozens of events were also included in databases and inventories realized at national scale, based on archive  
research (AVI database; Guzzetti et al., 1994) and aerial photo interpretation at 1:25.000 scale (IFFI landslide inventory  
65 map).

With the aim of providing a comprehensive landslide geodatabase of the Campi Flegrei area, we gathered all the landslide-  
related information made available from several sources, including a series of events collected by means of local press, news  
websites and fieldworks. Data were organized in GIS environment to guarantee an easy access, management, updating and  
sharing with different users. All the collected and revised data were used to develop a series of statistics about spatial and  
70 temporal distribution of the events, failure types, impact, and relationships with geological and geomorphological properties  
of the affected hillslopes. The CAmpi Flegrei LAAndslide Geodatabase (CAFLAG) here described may be used for future  
analyses aimed at evaluating the landslide susceptibility, hazard, and risk conditions, as well as to understand the  
geomorphic evolution of the study area. In addition, the CAFLAG data may be of relevant interest for the international  
landslide research community to understand landslide dynamics in volcanic settings during dormant phases, and to  
75 implement specific numerical models aimed at evaluating the landslide susceptibility in similar areas.

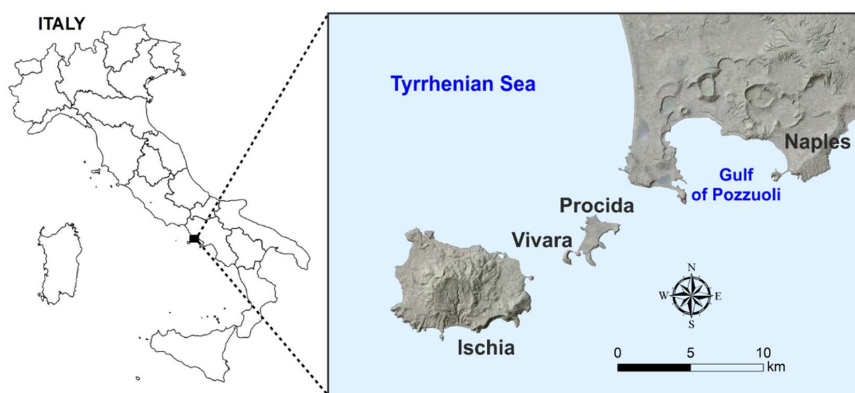

80 **Figure 1:** Location and shaded relief of the Campi Flegrei volcanic area. The shaded relief was developed from elevation data of  
the *SIT Regione Campania*.



## 2 Data and methods

### 2.1 Landslide source data

The CAFLAG geodatabase referred to the Campi Flegrei area shown in Fig. 1, including the western part of the city of Naples. All the considered landslide data sources were listed below. The first seven sources were considered as “archive” sources, whereas the last two as “new” sources:

- IFFI landslide inventory map (*Inventario Fenomeni Franosi in Italia*) (Trigila et al., 2010) ([www.progettoiffi.isprambiente.it/en/](http://www.progettoiffi.isprambiente.it/en/) accessed on 26 May 2022);
- AVI Catalog (*Aree storicamente Vulnerate in Italia da calamità geologiche ed idrauliche*) ([sici.irpi.cnr.it/avi.htm](http://sici.irpi.cnr.it/avi.htm), accessed on 26 May 2022);
- Landslide database and inventory map of the hydrographic Basin Authority (AdB) (namely Campania Centrale Basin Authority) ([www.distrettoappenninomeridionale.it/index.php/elaborati-di-piano-menu/bacini-reg-nord-occidentali-bacino-reg-sarno-ex-adb-reg-campania-centrale-menu/piano-assetto-idrogeologico-rischio-da-frana-menu](http://www.distrettoappenninomeridionale.it/index.php/elaborati-di-piano-menu/bacini-reg-nord-occidentali-bacino-reg-sarno-ex-adb-reg-campania-centrale-menu/piano-assetto-idrogeologico-rischio-da-frana-menu), accessed on 26 May 2022);
- Geological map of Italy - CARG (*Carta Geologica d'Italia*) project (Sheets 446-447, 464, 465; 1:25.000-1:50.000 scale) ([www.isprambiente.gov.it/Media/carg/campania.html](http://www.isprambiente.gov.it/Media/carg/campania.html), accessed on 26 May 2022);
- Landslide inventories of the city of Naples (Calcaterra et al. 2002, 2003a, 2007; Di Martire et al., 2012);
- Seismically induced landslide inventory of the Ischia Island (Caccavale et al., 2017, Rapolla et al., 2012);
- Scientific papers (Beneduce et al., 1988; Calcaterra et al., 2003b, 2010; Di Nocera et al., 2007);
- Field geomorphological surveys performed on coastal sectors during 2013-2018, documented by Esposito et al. (2015, 2017, 2018a, 2020) and Caputo et al. (2018);
- Landslide reports collected from digital archives of the principal newspapers and news websites in the study area (<https://napoli.repubblica.it/>; [www.ilmattino.it](http://www.ilmattino.it); [www.cronacaflegrea.it](http://www.cronacaflegrea.it); [www.montediproceda.com](http://www.montediproceda.com); [www.freebacoli.net](http://www.freebacoli.net); accessed several times during 2013-2018).

105

All of the events contained in the CAFLAG database were geocoded in a point shapefile, where each point referred to the center of the landslide scars. Pre-existing catalogues (IFFI, AVI, AdB) were available in shapefile formats, so that each event was already associated to a georeferenced point. The other sources, instead, provided static map images requiring a manual digitalization of the location points, or information allowing to place the representative point on the corresponding hillslope, by using as support the WMS services of the Campania Region webgis (<https://sit2.regione.campania.it/content/servizi-wms>, accessed on 26 May 2022), such as: topographic map at 1:5000 scale; ii) the derived Digital Terrain Model (DTM) with a pixel size of 5 m; iii) and orthophoto at 1:10000 scale. All these datasets refer to the years 2004-2005.

110



Given that the used sources included sometimes redundant events, a preliminary data filtering was performed manually by deleting those characterized by the same attributes and location, indicating therefore the same landslide event. Generally, the level of completeness of information associated to the collected events was quite heterogeneous, as well as the level of accuracy, as highlighted in the following section.

## 2.2 Geodatabase structure

Attributes associated to the landslide events of the CAFLAG geodatabase were specified in Table 1. The primary set of information referred to data sources, spatial and temporal properties of the events with related accuracy. High spatial accuracy was attributed to events associated with accurate geographical information, as for example accurate spatial coordinates provided in available databases, indications about the affected road section, specific buildings or sites. Where this type of information was unavailable, a low spatial accuracy was indicated, providing rough coordinates of the landslide-affected site (e.g. center of the locality, road or beach hit by the mass movement). High temporal accuracy was attributed to events associated with a complete date (i.e. dd/mm/yyyy), moderate accuracy to events characterized by both month and year of occurrence, and low accuracy to events which could be placed in a wide period of time, before or within a specific year. The movement type (fall, flow, slide, complex) and the involved material (earth, debris, rock) were defined according to the classification of Cruden and Varnes (1996). A secondary set of information referred to geomorphological properties of the landslide-affected sites, such as: i) type and name of the affected watersheds; ii) geomorphological context in terms of inner slope (i.e. not related to direct sea action), coastal slope, or quarry; iii) and morphometric properties of the affected hillslopes (elevation, slope, aspect) resulted from the intersection of each vector point with the DTM. By overlapping the point shapefile with engineering geological maps available for the area (Caccavale et al., 2017; Sacchi et al., 2015), both geotechnical and seismic properties of lithotypes involved in the landslides were provided, as well as the landslide hazard and susceptibility levels of the sites extracted from the Landslide Risk Plain of the Campania Centrale Basin Authority ([www.distrettoappenninomeridionale.it/index.php/elaborati-di-piano-menu/bacini-reg-nord-occidentali-bacino-reg-sarno-ex-adb-reg-campania-centrale-menu/piano-assetto-idrogeologico-rischio-da-frana-menu](http://www.distrettoappenninomeridionale.it/index.php/elaborati-di-piano-menu/bacini-reg-nord-occidentali-bacino-reg-sarno-ex-adb-reg-campania-centrale-menu/piano-assetto-idrogeologico-rischio-da-frana-menu), accessed on 26 May 2022). Further attributes described the impact of the cataloged landslides in terms of damage to anthropic structures and people, and in few cases only, indications about the factors predisposing or triggering the mass movements (e.g., rainfall, digging activities). All the statistical analyses were performed by means of the Microsoft<sup>TM</sup> Excel software, and results were displayed in a series of histograms and pie-charts. Statistics related to deadly events, based on the Frequency-Number relations, were aimed at analyzing the societal risk by continuing the work of Cascini et al. (2008).

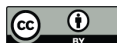

145 Table 1 – Attribute list of the CAFLAG database.

| ATTRIBUTE  | BRIEF DESCRIPTION                                                                      | TYPE              | FEATURES (range, classes, measure unit, etc.)                     |
|------------|----------------------------------------------------------------------------------------|-------------------|-------------------------------------------------------------------|
| ID         | A unique, incremental number as identifier for each landslide event                    | numeric           | 4 digits                                                          |
| SOURCE_T   | Typology of data source                                                                | text              | 2 classes (archive, new)                                          |
| SOURCE     | Name of data source                                                                    | text              | free                                                              |
| LATITUDE   | Latitude of the landslide-related vector point                                         | UTM km coordinate | EPSG:32633                                                        |
| LONGITUDE  | Longitude of the landslide-related vector point                                        | UTM km coordinate | EPSG:32633                                                        |
| TOWN       | Affected town                                                                          | text              | 13 towns                                                          |
| LOCALITY   | Affected locality (local name of the involved area)                                    | text              | free                                                              |
| LOCAT_ACC  | Location accuracy                                                                      | text              | 2 classes (low, high)                                             |
| TEMP_IND   | Temporal indication                                                                    | text              | 4 classes (time period, year, partial or full date of occurrence) |
| TEMP_ACC   | Temporal accuracy                                                                      | text              | 3 classes (low, moderate, high)                                   |
| YEAR       | Year of occurrence                                                                     | numeric           | 4 digits (yyyy)                                                   |
| MONTH      | Month of occurrence                                                                    | numeric           | 2 digits (mm)                                                     |
| DAY        | Day of occurrence                                                                      | numeric           | 2 digits (dd)                                                     |
| TIME       | Time of occurrence                                                                     | Time or day phase | hh:mm or 3 classes (morning, afternoon, night)                    |
| MOV_TYPE   | Type of movement according to the classification of Cruden and Varnes (1996)           | text              | 4 classes (fall, flow, slide, complex)                            |
| MAT_TYPE   | Type of displaced material according to the classification of Cruden and Varnes (1996) | text              | 3 classes (earth, debris, rock)                                   |
| ROUGH_VOL  | Rough volume of the displaced material                                                 | numeric           | expressed in m <sup>3</sup>                                       |
| WATER_TYPE | Type of watershed in which the landslide-affected site occurs                          | text              | 3 classes (coastal, endorheic, inland)                            |
| WATER_NAME | Name of the watershed in which the landslide-affected site occurs                      | text              | free                                                              |
| GEOM_CONT  | Geomorphological context in which the landslide-affected site occurs                   | text              | 3 classes (inner slope, coastal slope, quarry)                    |
| ELEVATION  | Elevation of the landslide-affected site                                               | numeric           | expressed in m a.s.l. (2-682)                                     |
| SLOPE      | Slope of the landslide-affected site                                                   | numeric           | expressed in angular degree (4-77)                                |
| ASPECT     | Aspect of the landslide-affected site                                                  | numeric           | expressed in angular degree (1-360)                               |
| UNIT_W     | Unit weight of the involved lithological unit (average)                                | numeric           | expressed in kN/m <sup>3</sup> (13.0-27.25)                       |
| FRICION_A  | Friction angle of the involved lithological unit (average)                             | numeric           | expressed in angular degree (25-40)                               |
| COHESION   | Cohesion of the involved lithological unit (average)                                   | numeric           | expressed in KPa (1-800)                                          |



|           |                                                                                                        |         |                                                                                  |
|-----------|--------------------------------------------------------------------------------------------------------|---------|----------------------------------------------------------------------------------|
| Vs30      | Average shear-wave velocity in the first 30 m of the site stratigraphic succession                     | numeric | expressed in m/s (150-1275)                                                      |
| AVG THICK | Average thickness of the pyroclastic cover                                                             | numeric | expressed in m (7-150)                                                           |
| HAZARD    | Hazard level related to the landslide-affected site, as evaluated by the local Basin Authority         | numeric | 4 classes (1, 2, 3, 4)                                                           |
| SUSC      | Susceptibility level related to the landslide-affected site, as evaluated by the local Basin Authority | numeric | 3 classes (1, 2, 3)                                                              |
| DAMAGE    | Type of damage                                                                                         | text    | free                                                                             |
| INJURED   | People injured                                                                                         | numeric | number (1-7)                                                                     |
| FATAL     | People killed                                                                                          | numeric | number (1-25)                                                                    |
| CAUSE     | Landslide predisposing or triggering factor                                                            | text    | 7 classes (digging, dumping, earthquake, mining, rainfall, water leak, wildfire) |

### 3 Study area

The Campi Flegrei (Fig. 1) is an active volcanic area located in southern Italy, within the central part of the Campanian Plain, a graben-like structure resulted from the tectonic displacement of a Mesozoic carbonate basement. The Campi Flegrei corresponds to a quasi-circular depression extending for about 200 km<sup>2</sup>, a large part of which develops off the **Pozzuoli Bay** (Sacchi et al., 2011), whereas the continental sector is located on the **Tyrrhenian coast**. The insular sector is represented by the islands of Ischia, Procida and Vivara (Fig. 1).

The most ancient volcanic activity is associated to the volcanism of the Ischia island, probably started more than 150 ka BP (Poli et al., 1987; Vezzoli, 1988), whereas the activity of the Procida Island occurred mostly about 70 ka BP (De Astis et al., 2004). About 39 ka BP, the catastrophic eruption of the Campanian Ignimbrite took place, causing the formation of a large caldera (Rosi and Sbrana, 1987; Orsi et al., 1996; Perrotta et al., 2006) that was reshaped by the more recent phreato-plinian eruption of the Neapolitan Yellow Tuff (NYT), dated at 15 ka BP (Scarpati et al., 1993; Insinga et al., 2004; Deino et al., 2004). Volcanic activity occurred after the NYT eruption is subdivided in three main epochs (Di Vito et al., 1999), which were interrupted by long periods of quiescence. In these epochs, minor explosive events occurred within the rim of the NYT caldera, creating at least 52 monogenic phreato-magmatic vents, including tuff rings, tuff cones, cinder and spatter cones (Di Vito et al., 1999; Insinga et al., 2006; Perrotta et al., 2011). The latest eruption, known as “Monte Nuovo Eruption”, occurred in the 1538 A.D. Currently, the Campi Flegrei is characterized by very high levels of volcanic risk due to many towns lying in the caldera characterized by unrest conditions, as demonstrated by widespread fumaroles, thermal springs, earthquakes and ongoing ground deformation.

The current geomorphological configuration of the continental and insular sectors of the Campi Flegrei was determined by the action of volcanic and geomorphic processes occurred in the last 15 ka, after the NYT eruption. Relics of volcanic edifices partially dismantled by sea erosion and landslides were identified along or near the present coastline and in the submarine part of the NYT caldera (e.g. Sacchi et al., 2009; 2011). The inland volcanoes were also affected by slope

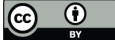

instability processes, and some of them ~~result~~ partially collapsed because of volcano-tectonics forming crater lakes. Landslides due to earthquakes, rainstorms, marine erosion or human actions have repeatedly affected the slopes of ~~ravine~~ and streams, as well as the steep scarps of gullies and coastal cliffs through time (Ducci & Napolitano, 1994; Guadagno and Mele, 1995; Mele and Del Prete, 1998; Del Prete and Mele, 1999, 2006; De Vita et al., 2006; Santo et al., 2012; Esposito et al., 2018a, 2020). Besides volcanic morphologies, the geomorphic setting of Campi Flegrei also includes lowlands that are located between volcanic edifices or close to the NYT caldera rims.

### 3.1. Weather and climate

The study area is characterized by a Mediterranean climate with hot, dry summers and moderately cool rainy winters. Mean annual temperatures are in the range of 10° at the hilly altitudes, 18°C along the coastline, and 15.5°C in the plains surrounding the inland reliefs (Ducci and Tranfaglia, 2005). The mean temperature of the warmest month (July) ranges between 24-28°C, whereas the mean temperature of the coldest month (January) ranges between 4°-6°C. The rainfall regime is characterized by the maximum amounts in autumn/winter, with a mean annual precipitation of about 700 mm. It is worth noting that during the summer and autumn seasons, the coastal sector is often hit by convective cells forming offshore. Such cells are able to release high amounts of rain in short times, with ~~max-10-min~~ rain rates higher than 100 mm/h, as highlighted by Esposito et al. (2015) and Fortelli et al. (2019). Waterspouts in front of the Flegrean coast are also associated with these cells. Winds blow mainly from three directions: west, north-east, south. They can reach wind gusts up to 140 km/h in the winter season, able to generate sea storms leading to severe damage on coastal settlements (Fortelli et al., 2021).

## 4 Results

The CAFLAG geodatabase encompasses 2302 landslides occurred throughout the continental, coastal and insular sectors of the Campi Flegrei, during the 1828 - 2017 time span (Fig. 2). Landslides characterized by high accurate position are 2122 (about 92 % of the total). Those with a temporal accuracy ranging from moderate to high are 482, corresponding to about 21 % of the total. Statistics showed in the following sections describe some general features of the collected data, which are useful to characterize the landslide phenomena in the area.



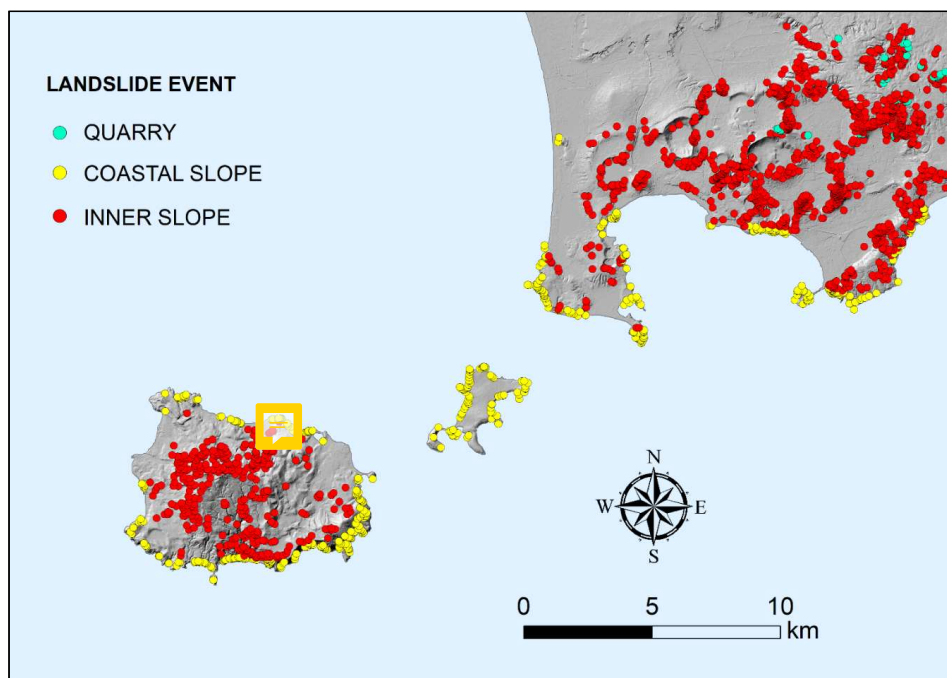

Figure 2: Map of the cataloged landslides, classified according to the geomorphological context (quarry, coastal and inner slopes). The shaded relief in the background was developed from elevation data of the *SIT Regione Campania*.

#### 4.1. Landslide general features

195 In this section, the statistical distribution of landslide kinematics, type of displaced material, and displaced volume are described. Data in Fig. 3 highlight that most of the cataloged landslides were characterized by a complex kinematics (1115). Among them, specific information about the failure mechanism was available for 343 complex landslides only (15%), whereas no indication was available for the others 772 (34 %). The further 1187 landslides were characterized by different kinematics, as shown in Fig. 3. Overall, by considering all the 1530 events with detailed kinematics information, the most  
200 recurrent failure mechanisms were fall (621 events – 41 %) and slide (614 events – 40 %).

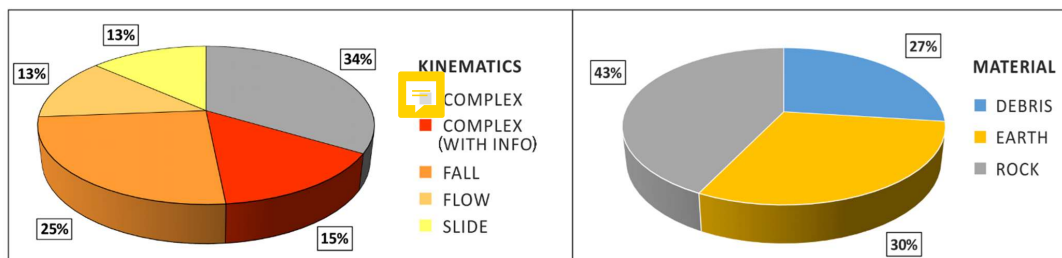

**Figure 3: Landslide events classified according to kinematics, on the left, and type of displaced material, on the right.**

Examples of rock fall are showed in Fig. 4. These failures are quite frequent both along the coastal and inner tuffaceous cliffs, determining episodic and localized cliff retreats that pose a serious risk for nearby buildings and people. They are able to displace huge rock masses, mobilizing up to thousands cubic meters of volcanoclastic rocks.

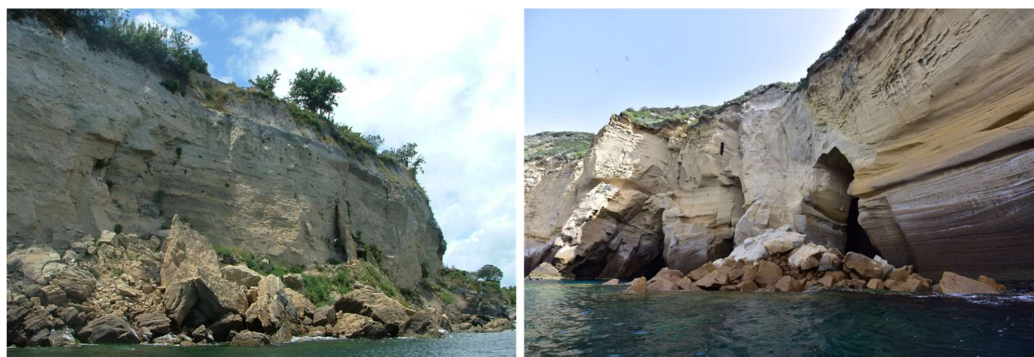

**Figure 4: Examples of rock fall affecting the Campi Flegrei coastal cliffs: Punta Miseno (2015) on the left, and Trentaremi - Capo Posillipo (2017) on the right. (Image credits: Alessandro Fedele, INGV).**

The Figure 5 shows instead a series of rainfall-induced shallow landslides displacing unconsolidated pyroclastic deposits and soils. Images refer to two different events affecting the Monte di Vezzi (Ischia Island) in April 2006, and the coastal cliff of Monte di Procida in 2010. Rocky cliffs like those represented in Fig. 4 resulted the most affected by landslides (43 %), whereas slopes covered by soils and fine pyroclastic deposits (earth) (Fig. 5) were affected by 30 % of the events. Coarser pyroclastic deposits or ancient landslide and debris deposits (debris) were those less involved by mass movements (27 %) (Fig. 3).

215

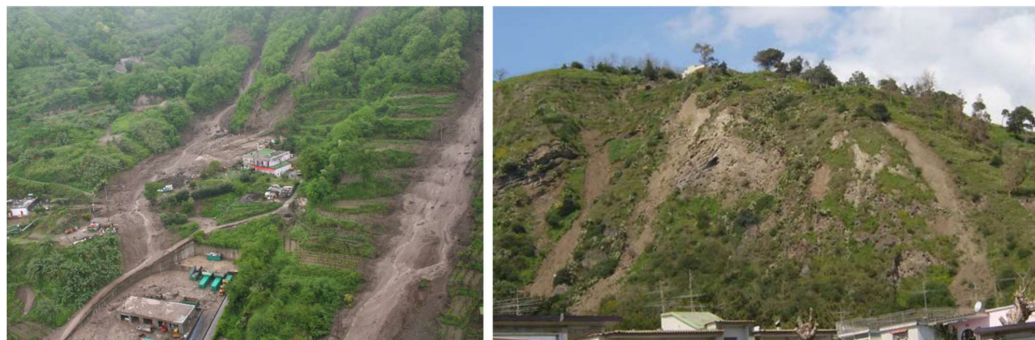

**Figure 5: Examples of flow-like mass movements at Ischia Island (2006), on the left, and at Monte di Procida (2010), on the right. (Image credits: Nucleo elicotteri Vigili del Fuoco Salerno; Prof. Paola Romano).**

Volumetric data were available for 277 landslides (Fig. 6), about 12 % of the whole dataset. Values ranged from 1 to 7.500 m<sup>3</sup> with a mean of about 123 m<sup>3</sup> per event. About 40 % of the landslides displaced a volume lower or equal to 10 m<sup>3</sup>, and 23 % a volume higher or equal to 100 m<sup>3</sup>.

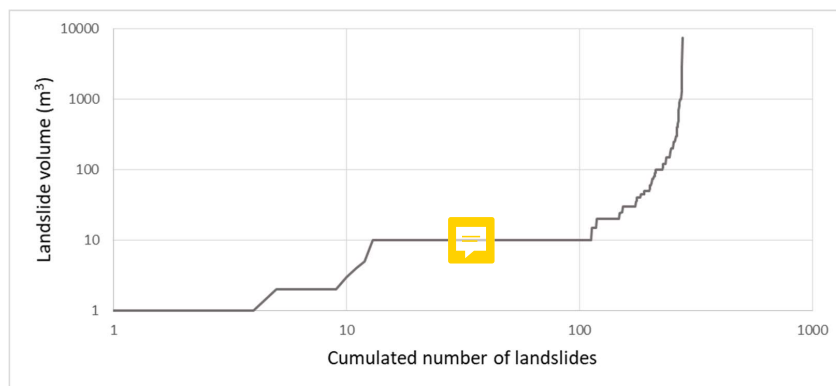

**Figure 6: Cumulated frequency distribution of landslides volume.**

#### 4.2. Geomorphic and engineering geological properties of the affected hillslopes

225 Statistics related to the 2122 landslides characterized by an accurate location (high) show that 53 % of them occurred in steep terrains characterized by slope angles ranging from 30 to 77 degrees, whereas 47 % occurred in more gentle slopes characterized by slope angles lower than 30 degrees. The highest frequency of events resulted in the slope class from 30 to 40 degrees (22 %) (Fig. 7).



Aspect data (Fig. 7) show a prevalence of landslides along slopes exposed towards the western directions. A lower frequency of events resulted instead for slopes exposed towards East; this can be linked to the direction from which the rainstorms usually came (i.e. Tyrrhenian sea located to the west of the study area - Fig. 1).

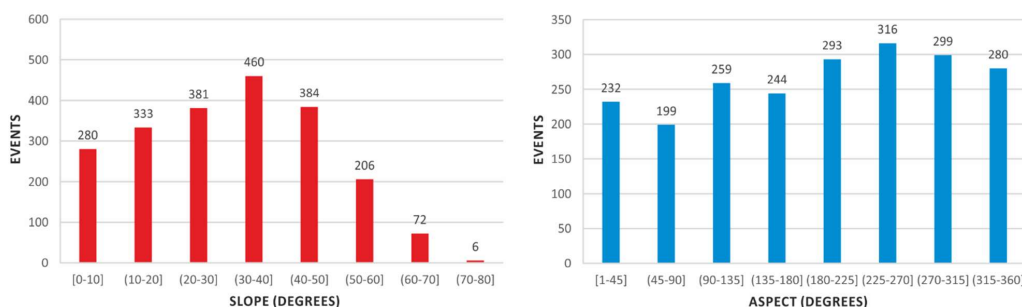

**Figure 7: Distribution of the landslide events according to the slope gradient and aspect of the affected hillslopes.**

Most of the landslides occurred along the inner hillslopes (78 %), about 21 % affected coastal cliffs, and 1 % occurred along quarry cliffs. On the other side, by considering the relative area of these three geomorphological contexts, the highest concentration of landslides was found along the coastal sector (Fig. 8).

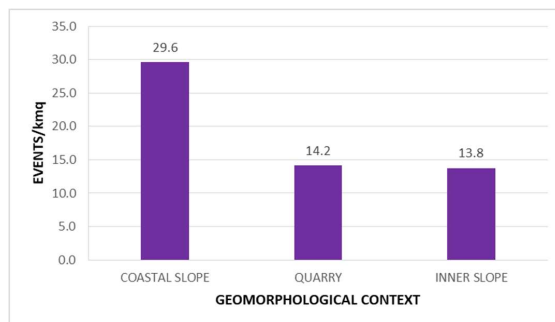

**Figure 8: Distribution of the landslide events according to the geomorphological context.**

Statistics of the average unit weights characterizing lithologies involved in 2106 mass movements reveal a concentration of records (92 %) in correspondence of typical values of volcanoclastic deposits, in a range from 13 to 17 kN/m<sup>3</sup> (Fig. 9A). Few events (8 %) displaced lithologies characterized by higher values, corresponding to lavas and other lithoid rocks outcropping in the area. Histogram of the friction angle highlights values typical of pyroclastic rocks (Caccavale et al, 2017 and reference therein) ranging from 25° to 40°, depending on the degree of density and mineral composition, with highest frequency in the



245 ranges from 25° to 31° (Fig. 9B). At the same time, cohesion also concentrates in the typical interval of weakly welded  
 pyroclastic deposits, and specifically below 50 kPa, whereas higher values refer to the most lithified rocks (Fig. 9C).  
 Statistical distribution of the Vs30 parameter related to 2078 landslides indicates that 73 % affected lithologies characterized  
 by low Vs30 values, ranging from 100 to 400 m/s (Fig. 9D), which are due to the cohesionless properties of pyroclastic  
 deposits.

250

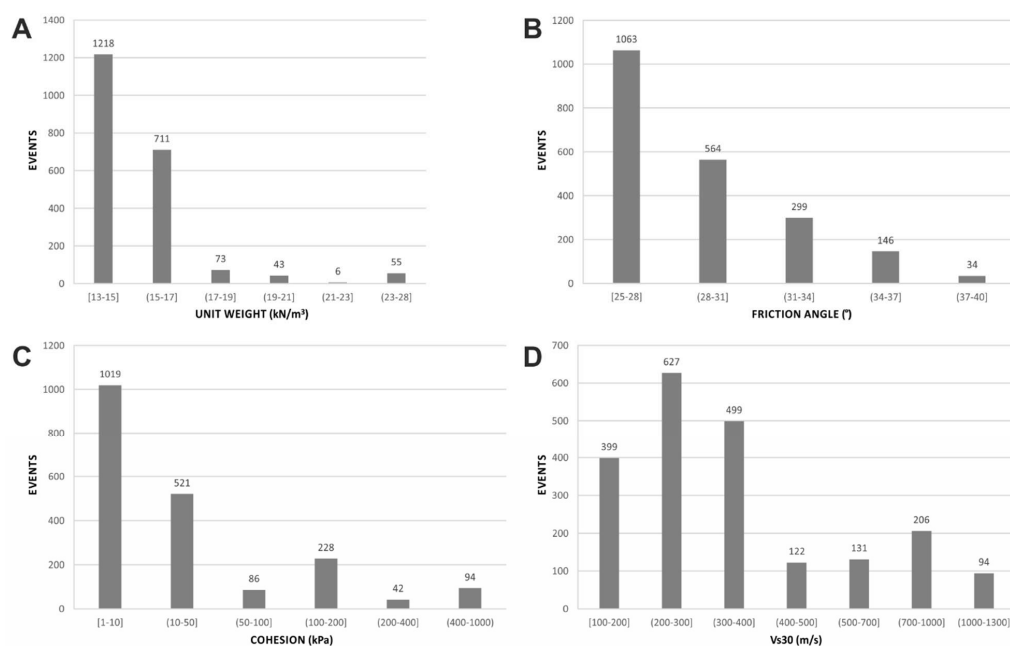

**Figure 9: Distribution of the landslide events according to the unit weight (A), friction angle (B), cohesion (C) and Vs30 (D) of the displaced lithologies.**

### 4.3. Temporal distribution

255 The year of occurrence was known for 517 landslides only, with monthly information available for 482 of them. The yearly  
 trend (Fig. 10A) shows that, generally, the study area was affected by an approximately linear increase in the number of  
 landslides until the half of the '80s. After this period, the increase climbed up with peaks in the years 1986, 1997, 2005 (i.e.  
 50, 91, 70 events, respectively), exceeding significantly the average value of 2.4 events per year. Most of the events occurred  
 in the winter season, and specifically in the months from January to March, whereas fewer events resulted in the other  
 260 months (Fig. 10B).

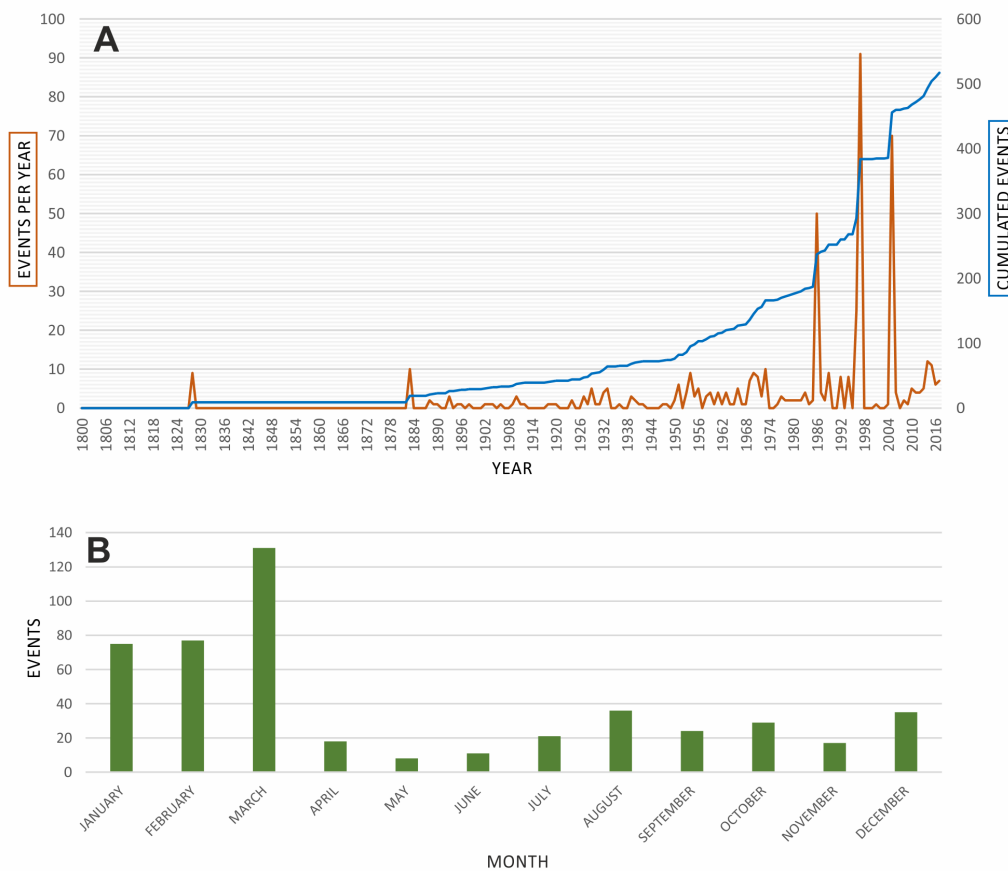

**Figure 10: Yearly (A) and monthly (B) distribution of the landslide events characterized by temporal information.**

#### 4.4. Deadly impact and societal risk

265 According to the information collected in the CAFLAG database, 127 people lost their life as consequence of 53 fatal landslides occurred after 1900. The temporal distribution of fatalities is represented in Fig. 11; here, the cumulative curve has a stepped shape, and its slope increases in correspondence of significant events in terms of fatalities, such as the landslide of 1948, corresponding to the deadliest within the analyzed time period (25 fatalities). Since the early 1990s, the frequency of deadly events decreased, as highlighted by a gentler slope of the cumulative curve. This trend can be due to the



270 increased resilience of local communities based on new technologies and prevention measures, as well as on a higher awareness about the risk posed by geo-hydrological processes, as documented also at national scale (Rossi et al., 2019).

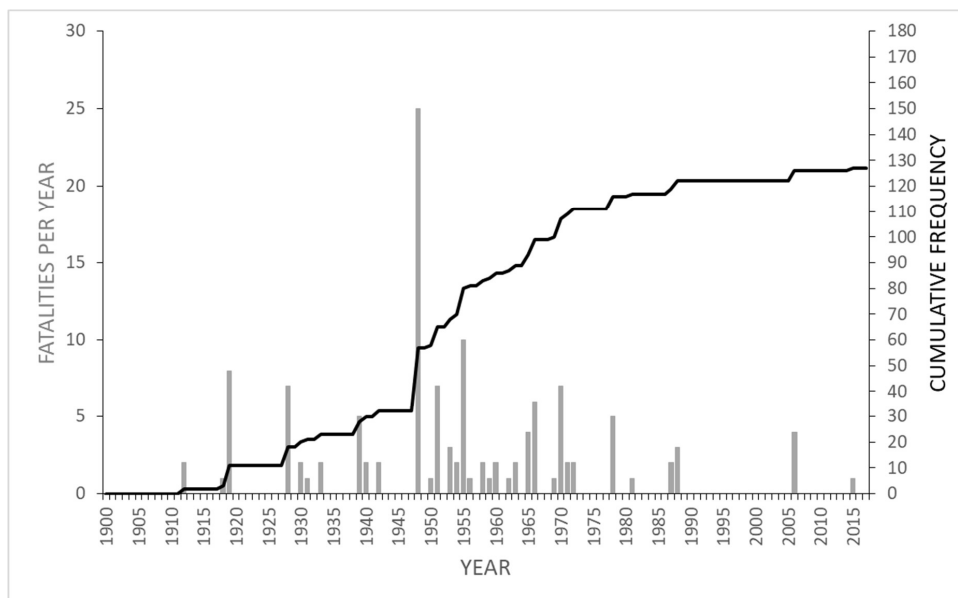

**Figure 11: Statistics of fatalities caused by landslides in the analyzed time span.**

275 In order to analyze the societal risk posed by landslides in the study area, a F-N curve was also developed. This curve represents the cumulative probability per year (F) that landslides will cause N or more fatalities versus the number of fatalities resulting from landslides (Fell and Hartford, 1997). The F-N curve displayed in Fig. 12 is in accordance with that developed by Cascini et al. (2008) which encompasses events occurred also in the whole city of Naples, in the time interval 1640-2006.

280

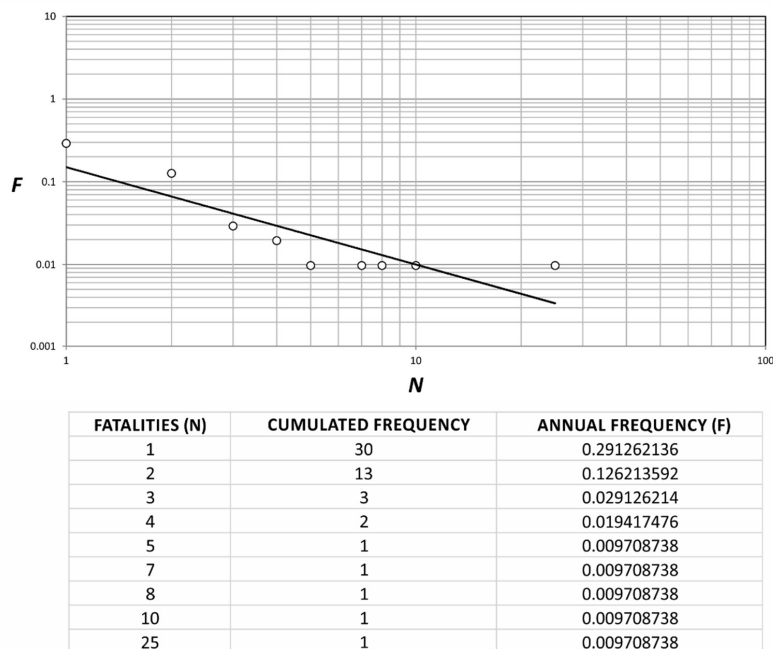

Figure 12: F-N curve and related parameters.

### 5 Data availability

The Campi Flegrei LAndslide Geodatabase (CAFLAG) is freely available in the 4TU.ResearchData repository at  
 285 <https://doi.org/10.4121/14440757.v2> (Esposito and Matano, 2021).

### 6 Summary and conclusions

The CAFLAG database presented in this study confirms that besides volcanic and seismic hazards, the Campi Flegrei area is also affected by a widespread landslide hazard. Mass wasting processes are contributing to the geomorphological evolution of the whole area and, specifically, of the coastal sector. Recent studies have indicated decadal retreat rates of volcanoclastic coastal cliffs in the order of 1.20 m/yr (i.e. Torrefumo cliff during 1956-74; Esposito et al., 2018a), and short-term (annual) 290 retreat rates within 0.01-0.10 m/yr on average (i.e. Coroglio cliff during 2013-15 – Caputo et al. 2018, and Torrefumo cliff during 2013-16 – Esposito et al., 2018a).





The cataloged events were of different types and magnitudes, and some of them resulted in fatalities. Statistics show that rocky slopes formed by lithified volcanic rocks, such as lava, tuff or ignimbrite, were mostly affected by rock falls. In the coastal area, this was documented by Ducci and Napolitano (1991), who analyzed the cliff failures along the Procida island coastline observing that all of the identified collapses were rock falls and topples involving tuffaceous formations. Similar results were achieved by Del Prete and Mele (1999) for the cliffs of the Ischia Island. Collapses of the coastal cliffs can be considered the most important agents leading to cliff retreat in the area, also because are able to remove large volumes of rocks in short times. In the inland areas, however, many landslides affected the walls of old and abandoned quarries or digging front (Calcaterra et al., 2007). Discontinuity systems characterizing rock masses play a fundamental role in predisposing rocky slopes to failure processes, as well as in controlling the volume of the mobilized rocks. In the study area, discontinuities consist of faults, joints and fractures associated to volcano-tectonic processes (Vitale and Isaia, 2014). Other failure-predisposing factors include geotechnical properties (e.g. low cohesion in Fig. 9) and weathering processes typical of the Flegrean area, such as the zeolitization and argillification of pyroclastic rocks. Water circulation, earthquakes, sea wave action, or anthropic vibrations can be considered among the main triggering factors. Besides the dominance of landslides involving lithoid rocks, the shallow sliding of loose pyroclastic deposits (i.e. pumices, scoria, ashes and lapilli) and soils covering the lithified formations is also frequent. Commonly, these failures start as translational slide and evolve into debris flows within gullies or avalanches along the steep volcanic slopes (Fig. 5) (Calcaterra et al., 2003a). Intense rainfall represents the triggering factor of the initial slide. Elevated slope angles and geotechnical properties of the involved material (Fig. 9) lead to a rapid or very rapid evolution in flow processes.

Further statistics show that many events affected hillslopes exposed towards west, north and south. This may be explained by the frequent impact of these hillslopes with convective cells and low-pressure systems coming from the Tyrrhenian Sea. These meteorological structures are able to release high amounts of rainfall, causing also flash flood processes (e.g. Esposito et al., 2015, 2018b), and are often associated with strong winds and storm surges damaging coastal infrastructures, as documented in the city of Naples in 2020 (Fortelli et al., 2021).

Another relevant finding of the current analysis is that in the analyzed time period, 53 landslide events caused 127 fatalities (Fig. 11). Most of the people died in the city of Naples, hit by rocky blocks detached from steep tuffaceous slopes; others died because of flow-like mass movements, mostly recurrent in the Ischia Island (e.g. Santo et al., 2012). The intense urbanization of the area developed after the Second World War determined an increase of fatal landslides (Fig. 11) and risk conditions in a way that, as highlighted also by the F-N curve (Fig. 12), landslides in the area represent a relevant societal risk. Even whether fatalities decreased after the '90s, this situation requires still more efforts to local and national authorities to reduce the risk affecting the local population.



**Author contributions.** GE and FM collected and processed the data. GE prepared the first draft of the paper. FM edited and integrated the text at several stages, supervising the research activity.

325 **Competing interests.** The authors declare that they have no conflict of interest.

**Acknowledgements.** A first draft of the geodatabase was developed within the Research Project PON MONICA funded by the Italian Ministry of Education, University and Research (grant number PON01\_01525 - Coordinator of the CNR-IAMC Research unit: Dr. Marco Sacchi; National Coordinator: Dr. Giuseppe De Natale - INGV).

## References

- 330 Ablay, G. and Hürlimann, M.: Evolution of the north flank of Tenerife by recurrent giant landslides, *Journal of Volcanology and Geothermal Research*, 103, 135-159, 2000.
- Beneduce, P., D'Elia, G., and Guida, M.: Morfodinamica dei versanti dell'area flegrea (Campania): erosione in massa ed erosione lineare, *Memorie della Società Geologica Italiana*, 41, 949-961, 1988.
- 335 Caccavale, M., Matano, F., and Sacchi, M.: An integrated approach to earthquake-induced landslide hazard zoning based on probabilistic seismic scenario for Phlegrean Islands (Ischia, Procida and Vivara), Italy, *Geomorphology*, 295, 235-259, 2017.
- Calcaterra, D., de Riso, R., Nave, A., and Sgambati, D.: The role of historical information in landslide hazard assessment of urban areas: the case of Naples (Italy), *Proc. 1st European Conference on Landslides*, 129-135, Swets & Zeitlinger, Lisse, The Netherlands, ISBN 905809393X, 2002.
- 340 Calcaterra, D., de Riso, R., Evangelista, A., Nicotera, M.V., Santo, A., and Scotto Di Santolo, A.: Slope instabilities in the pyroclastic deposits of the Phlegraean district and the carbonate Apennine (Campania, Italy), *International Workshop on Occurrence and Mechanisms of Flows in Natural Slopes and Earthfills, Iw-Flows 2003*, Sorrento, May, 14-16, 1-9, 2003a
- Calcaterra, D., Del Prete, S., and Mele, R.: L'influenza dei fenomeni franosi sugli insediamenti costieri del Distretto Flegreo, *Proc. CITTAM 2003*, Napoli 26-28 giugno 2003, Arte Tipografica Editrice, Napoli, Italy, 524-534, 2003b.
- 345 Calcaterra, D. and de Luca Tuppiti Schinosa, F.: The February 28, 1868 Mt. Echia rockfall in the framework of the historical and present-day landslide activity at Naples, Italy, *Geophysical Research Abstracts*, 8, 04708, 2006.
- Calcaterra, D., Coppin, D., de Vita, S., Di Vito, M. A., Orsi, G., Palma, B., and Parise, M.: Slope processes in weathered volcanoclastic deposits within the city of Naples: the Camaldoli Hill case, *Geomorphology*, 87(3), 132-157, 2007.
- Calcaterra, D., de Luca Tuppiti Schinosa, F., Evangelista, A., Ruopolo, S., and Scotto di Santolo, A.: Modeling of rainfall-induced surficial slide-flows in the pyroclastic deposits of the Astroni crater (Phlegrean Fields), in: *Proc. 1st Italian Workshop on Landslides "Rainfall-induced landslides: mechanisms, monitoring techniques and nowcasting models for early warning systems"*, Naples, Italy, 8-10 June 2009, 2, 9-19, 2010
- 350 Capra, L., Poblete, M.A., and Alvarado, R.: The 1997 and 2001 lahars of Popocatepetl volcano (Central Mexico): textural and sedimentological constraints on their origin and hazards, *Journal of Volcanology and Geothermal Research*, 131, 351-369, 2004.
- 355 Caputo, T., Marino, E., Matano, F., Somma, R., Troise, C., and De Natale, G.: Terrestrial Laser Scanning (TLS) data for the analysis of coastal tuff cliff retreat: application to Coroglio cliff, Naples, Italy, *Ann. Geophys.*, 61, SE110, <https://doi.org/10.4401/ag-7494>, 2018.
- 360 Carrara, A., Cardinali, M., Guzzetti, F., and Reichenbach, P.: GIS technology in mapping landslide hazard, in: Carrara, A., Guzzetti, F. (eds) *Geographical information systems in assessing natural hazards*, Kluwer, Dordrecht, The Netherlands, 135-175, 1995.



- Casalbore, D., Passeri, F., Tommasi, P., Verrucci, L., Bosman, A., Romagnoli, C., and Chiocci, F.L.: Small-scale slope instability on the submarine flanks of insular volcanoes: the case-study of the Sciara del Fuoco slope (Stromboli), *International Journal of Earth Sciences*, 109 (8), 2643–2658, 2020.
- 365 Cascini, L., Ferlisi, S., and Vitolo, E.: Individual and societal risk owing to landslides in the Campania region (southern Italy), *Georisk*, 2 (3), 125–140, 2008.
- Chiocci, F.L., Romagnoli, C., Tommasi, P., and Bosman, A.: The Stromboli 2002 tsunamigenic submarine slide: Characteristics and possible failure mechanisms, *Journal of Geophysical Research: Solid Earth*, 113 (10), art. no. B10102, 2008.
- 370 Coombs, M.L., White, S.M., and Scholl, D.W.: Massive edifice failure at Aleutian arc volcanoes: *Earth and Planetary Science Letters*, 256, 403–418, 2007.
- Cruden, D.M. and Varnes, D.J.: Landslides types and processes, in A. K. Turner & R. L. Schuster (Eds.), *Landslides: Investigation and mitigation* (pp. 36–75). Transportation Research Board Representative 247. Washington, DC: National Research Council: 1996.
- 375 De Astis, G., Pappalardo, L., and Piochi, M.: Procida volcanic history: New insights into the evolution of the Phlegraean Volcanic District (Campania region, Italy), *Bulletin of Volcanology*, 66(7), 622–641, 2004.
- De Natale, G., Troise, C., Pingue, F., Mastrolorenzo, G., Pappalardo, L., Battaglia, M., and Boschi, E.: The Campi Flegrei caldera: Unrest mechanisms and hazards, *Geological Society, London, Special Publications*, 269, 25–45, 2006.
- De Vita, S., Sansivero, F., Orsi, G., and Marotta, E.: Cyclical slope instability and volcanism related to volcano-tectonism in resurgent calderas: the Ischia island (Italy) case study, *Engineering Geology* 86, 148–165, 2006.
- 380 De Vita, P., Di Clemente, E., Rolandi, M., and Celico, P.: Engineering geological models of the initial landslides occurred on the April 30th, 2006, at the Mount Di Vezzi (Ischia Island, Italy), *Italian Journal of Engineering Geology and Environment*, 2(2007), 119–141, 2007.
- Deino, A.L., Orsi, G., de Vita, S., and Piochi, M.: The age of the Neapolitan Yellow Tuff caldera-forming eruption (Campi Flegrei caldera-Italy) assessed by <sup>40</sup>Ar/<sup>39</sup>Ar dating method, *Journal of Volcanology and Geothermal Research*, 133, 157–170, 2004.
- 385 Del Prete, S. and Mele, R.: L'influenza dei fenomeni di instabilità di versante nel quadro morfoevolutivo della costa dell'isola d'Ischia, *Bollettino Società Geologica Italiana* 118 (2), 339–360, 1999.
- Del Prete, S. and Mele, R.: Il contributo delle informazioni storiche per la valutazione della propensione al dissesto nell'Isola d'Ischia (Campania), *Rendiconti Società Geologica Italiana* (n.s., 2), 29–47, 2006.
- 390 Devoli G., Strauch, W., Chávez, G., and Høeg, K.: A landslide database for Nicaragua: a tool for landslide-hazard management, *Landslides*, 4, 163–176, doi: 10.1007/s10346-006-0074-8, 2007.
- Di Martire, D., De Rosa, M., Pesce, V., Santangelo, M. A., and Calcaterra, D.: Landslide hazard and land management in high-density urban areas of Campania region, Italy, *Natural Hazards and Earth System Sciences*, 12, 905–926, doi:10.5194/nhess-12-905-2012, 2012.
- 395 Di Nocera, S., Matano, F., Rolandi, G., and Rolandi R.: Contributo sugli aspetti geologici e vulcanologici di monte di Vezzi (isola d'Ischia) per lo studio degli eventi franosi dell'aprile 2006, *Italian Journal of Engineering Geology and Environment*, 2, 27–52, 2007.
- 400 Di Traglia, F., Roverato, M., Bonforte, A., and Gross, F.: Editorial: Flank dynamics, sector collapses, lahars, and rockfalls: analysis, monitoring, and modelling of small to large scale volcanic slope instability, *International Journal of Earth Sciences*, 109(8), 2615–2618, 2020.



- Di Vito, M.A., Isaia, R., Orsi, G., Southon, J., de Vita, S., D'Antonio, M., Pappalardo, L., and Piochi, M.: Volcanism and deformation since 12,000 years at the Campi Flegrei caldera (Italy), *Journal of Volcanology and Geothermal Research*, 91, 221–246, 1999.
- 405 Ducci, D. and Napolitano, P.: Le condizioni di stabilità delle coste dell'Isola di Procida (golfo di Napoli), *Atti 1° conv. Naz. Giovani Ric. in Geol. Appl., Ric. Scient. ed eucaz. perman., suppl.* 93, 97–106, Milano, 1991.
- Ducci, D. and Napolitano, P.: Franosità e caratterizzazione geomeccanica delle facies litoidi delle Formazioni di Solchiaro e Terra Murata (Procida), *Geologica Romana*, 30, 97–104, 1994.
- Ducci D. and Tranfaglia, G.: L'impatto dei cambiamenti climatici sulle risorse idriche sotterranee in Campania, *Geologi*, 1–4, 13–21, 2005.
- 410 Dufresne, A., Siebert, L., and Bernard, B.: Distribution and Geometric Parameters of Volcanic Debris Avalanches Deposits, in: Roverato, M., Dufresne, A., Procter, J. (eds) *Volcanic Debris Avalanches. Advances in Volcanology*. Springer, Cham. [https://doi.org/10.1007/978-3-030-57411-6\\_4](https://doi.org/10.1007/978-3-030-57411-6_4)
- Esposito, G., Fortelli, A., Grimaldi, G.M., Matano, F., and Sacchi, M.: I fenomeni di flash flood nell'area costiera di Pozzuoli (Napoli, Italia): risultati preliminari sull'analisi dell'evento del 6 novembre 2011, *Rendiconti Online della Società Geologica Italiana*, 34, 74–84, 2015.
- 415 Esposito, G., Salvini, R., Matano, F., Sacchi, M., Danzi, M., Somma, R., and Troise, C.: Multitemporal monitoring of a coastal landslide through sfm-derived point cloud comparison, *The Photogrammetric Record*, 32, 459–479, <https://doi.org/10.1111/phor.12218>, 2017.
- 420 Esposito, G., Salvini, R., Matano, F., Sacchi, M., and Troise, C.: Evaluation of geomorphic changes and retreat rates of a coastal pyroclastic cliff in the Campi Flegrei volcanic district, southern Italy, *Journal of Coastal Conservation*, 22, 957–972, <https://doi.org/10.1007/s11852-018-0621-1>, 2018a.
- Esposito, G., Matano, F., and Scepi, G.: Analysis of increasing flash flood frequency in the densely urbanized coastline of the Campi Flegrei volcanic area, Italy, *Frontiers in Earth Science*, 6, 63, 2018b.
- 425 Esposito, G., Parodi, A., Lagasio, M., Masi, R., Nanni, G., Russo, F., Alfano, S., and Giannatiempo, G.: Characterizing Consecutive Flooding Events after the 2017 Mt. Salto Wildfires (Southern Italy): Hazard and Emergency Management Implications, *Water*, 11, 2663, 2019
- Esposito, G., Matano, F., Sacchi, M., and Salvini, R.: Mechanisms and frequency-size statistics of failures characterizing a coastal cliff partially protected from the wave erosive action, *Rendiconti Lincei - Scienze Fisiche e Naturali*, 31, 2, 337–351, 2020.
- 430 Esposito, G. and Matano, F.: CAmpi Flegrei LAndslide Geodatabase (CAFLAG), <https://doi.org/10.4121/14440757.v2>, 2021.
- Fell, R. and Hartford, D.: Landslide risk management, in: Cruden, D.M., Fell, R. (eds.), *Landslide Risk Assessment*, Proc. Int. Workshop Landslide Risk Assessment, Balkema, 51–109, 1997.
- 435 Fortelli, A., Scafetta, N., and Mazzarella, A.: Nowcasting and real-time monitoring of heavy rainfall events inducing flash-floods: an application to Phlegraean area (Central-Southern Italy), *Natural Hazards*, 97, 861–889, 2019.
- Fortelli, A., Fedele, A., De Natale, G., Matano, F., Sacchi, M., Troise, C., and Somma, R.: Analysis of Sea Storm Events in the Mediterranean Sea: The Case Study of 28 December 2020 Sea Storm in the Gulf of Naples, Italy, *Applied Sciences*, 11, 23, 11460, doi: 10.3390/app112311460, 2021
- 440 Guadagno, F.M. and Mele, R.: I movimenti franosi indotti da terremoti nell'isola d'Ischia, in: Vallario, A., Bonardi, G., De Vivo, B., Gasparini, P. (Eds.), *Cinquant'anni di ricerca e di didattica del Prof. Felice Ippolito*, Liguori, Naples, 127–137, 1995.



- Guzzetti, F., Cardinali, M., and Reichenbach, P.: The AVI Project: a bibliographical and archive inventory of landslides and floods in Italy, *Environmental Management*, 18, 4, 623–633, 1994.
- 445 Guzzetti, F., Mondini, A.C., Cardinali, M., Fiorucci, F., Santangelo, M., and Chang, K.T.: Landslide inventory maps: New tools for an old problem, *Earth-Science Reviews*, 112, 42–66, 2012.
- Insinga, D., Calvert, A., D’Argenio, B., Fedele, L., Lanphere, M., Morra, V., Perrotta, A., Sacchi, M., and Scarpati, C.: <sup>40</sup>Ar/<sup>39</sup>Ar dating of the Neapolitan Yellow Tuff eruption (Campi Flegrei, southern Italy), *Proceedings of the European Geophysical Union (EGU) 1st General Assembly, Nice, 2004*.
- 450 Insinga, D., Calvert, A.T., Lanphere, M.A., Morra, V., Perrotta, A., Sacchi, M., Scarpati, C., and Fedele, L.: The Late-Holocene evolution of the Miseno area (south-western Campi Flegrei) as inferred by stratigraphy, petrochemistry and <sup>40</sup>Ar/<sup>39</sup>Ar geochronology, *Volcanism in the Campania Plain: Vesuvius, Campi Flegrei and Ignimbrites* (Edited by B. De Vivo), Chapter 6. *Developments in Volcanology, Volume 9*, 97–124, 2006.
- Lavigne, F. and Thouret, J.C.: Sediment transportation and deposition by rain-triggered lahars at Merapi Volcano, Central Java, Indonesia, *Geomorphology*, 49, 45–69, 2003.
- 455 Masson, D.G., Harbitz, C.B., Wynn, R.B., Pedersen, G., and Løvholt, F.: Submarine landslides: processes, triggers and hazard prediction *Philosophical Transactions of Royal Society A.*, 364, 2009–2039, 2006.
- Matano, F., Iuliano, S., Somma, R., Marino, E., Del Vecchio, U., Esposito, G., Molisso, F., Scepi, G., Grimaldi, G. M., Pignatola, A., Caputo, T., Troise, C., De Natale, G., and Sacchi, M.: Geostucture of Coroglio tuff cliff, Naples (Italy) derived from terrestrial laser scanner data, *Journal of Maps*, 12, 407–421, 2016.
- 460 Mele, R. and Del Prete, S.: Fenomeni di instabilità dei versanti in Tufo Verde del Monte Epomeo (Isola d’Ischia-Campania), *Bollettino della Società Geologica Italiana*, 117, 93–112, 1998.
- Miele, P., Di Napoli, M., Novellino, A., Calcaterra, D., Mallorqui, J.J., and Di Martire, D.: SAR data and field surveys combination to update rainfall-induced shallow landslide inventory, *Remote Sensing Applications: Society and Environment*, 26, 100755, 2022.
- 465 Napolitano, E., Marchesini, I., Salvati, P., Donnini, M., Bianchi, C., and Guzzetti, F.: LAND-deFeND – An innovative database structure for landslides and floods and their consequences, *Journal of Environmental Management*, 207, 203–218, 2018.
- Oehler, J.F., Labazuy, P., and Lénat, J.F.: Recurrence of major flank landslides during the last 2-Ma-history of Reunion Island. *Bulletin of Volcanology*, 66, 585–598, 2004.
- 470 Orsi, G., de Vita, S., and Di Vito, M.: The restless, resurgent Campi Flegrei Nested Caldera (Italy): Constraints on its evolution and configuration, *Journal of Volcanology and Geothermal Research*, 74, 179–214, 1996.
- Perrotta, A., Scarpati, C., Luongo, G., and Morra, V.: The Campi Flegrei caldera boundary in the city of Naples, in: *De Vivo B (ed) Volcanism in the campania plain: Vesuvius, Campi Flegrei and ignimbrites*, Elsevier, Amsterdam, 85–96, 2006.
- 475 Perrotta, A., Scarpati, C., Luongo, G., and Morra, V.: Stratigraphy and volcanological evolution of the southwestern sector of Campi Flegrei and Procida Island, Italy, *Geological Society of America Special Paper*, 464, 171–191, 2011.
- Pierson, T.C., Wood, N.J., and Driedger, C.L.: Reducing risk from lahar hazards: concepts, case studies, and roles for scientists", *Journal of Applied Volcanology*, 3 (1), 16, doi:10.1186/s13617-014-0016-4, 2014.
- 480 Poli, S., Chiesa, S., Gillot, P.Y., Gregnanin, A., and Guichard, F.: Chemistry versus time in the volcanic complex of Ischia (Gulf of Naples, Italy): evidence of successive magmatic cycles, *Contributions to Mineralogy and Petrology*, 95, 322–335, 1987.
- Rapolla, A., Di Nocera, S., Matano, F., Paoletti, V., and Tarallo, D.: Susceptibility regional zonation of earthquake-induced landslides in Campania, Southern Italy, *Natural Hazards* 61 (1), 115–126, 2012.



- Rosi, M. and Sbrana, A.: The Phlegrean fields, Consiglio Nazionale delle Ricerche, Quaderni de “La Ricerca Scientifica, Rome, 1987.
- 485 Rossi M., Guzzetti F., Salvati P., Donnini M., Napolitano E., and Cinzia B.: A predictive model of societal landslide risk in Italy, *Earth-Science Reviews*, 196, 102849, <https://doi.org/10.1016/j.earscirev.2019.04.021>, 2019.
- Sacchi, M., Alessio, G., Aquino, I., Esposito, E., Molisso, F., Nappi, R., Porfido, S., and Violante, C.: Risultati preliminari della campagna oceanografica CAFE\_07 e leg 3 nei Golfi di Napoli e Pozzuoli, Mar Tirreno Orientale, *Quaderni di Geofisica*, 64, 3-26, 2009.
- 490 Sacchi, M., Di Fiore, V., Esposito, E., Fekete, N., Metzen, J., Molisso, F., Porfido, S., Spiess, V., and Violante C.: New High-Resolution Seismic Data off the Campi Flegrei: Insights into the Evolution of the Neapolitan Yellow Tuff (NYT) Caldera, Eastern Tyrrhenian Margin, *Marine Research at CNR - Marine Geology*, DTA/06-2011, 691-703, 2011.
- Sacchi, M., Caputo, T., Esposito, G., Somma, R., Matano, F., Caccavale, M., Del Vecchio, U., Fortelli, A., Grimaldi, G.M., Iuliano, S., Latte Bovio, G., Marino, E., Di Meglio, C., Minardo, A., Pignalosa, A., Terracciano, R., Troise, C., Zeni, L., and De Natale G.: Sistema integrato di monitoraggio (TCM - Tuff Cliff Monitoring) dei fenomeni di dissesto lungo il costone tufaceo di Coroglio (Napoli), *Rapporti Tecnici INGV*, 309, 72 pp., 2015.
- 495 Santo, A., Di Crescenzo, G., Del Prete, S., and Di Iorio, L.: The Ischia island flash flood of November 2009 (Italy): phenomenon analysis and flood hazard, *Physics and Chemistry of the Earth*, 49, 3–17, 2012.
- 500 Scarpati, C., Cole, P., and Perrotta, A.: The Neapolitan yellow Tuff - a large volume multiphase eruption from Campi Flegrei, Southern Italy, *Bulletin of Volcanology*, 55, 343-356, 1993.
- Siebert, L. and Roverato, M.: A Historical Perspective on Lateral Collapse and Volcanic Debris Avalanches, in: Roverato, M., Dufresne, A., Procter, J. (eds) *Volcanic Debris Avalanches. Advances in Volcanology*. Springer, Cham, 2021.
- Soeters, R. and van Westen, C.J.: Slope Instability Recognition Analysis and Zonation, in: Turner K.T. and Schuster, R.L., Eds., *Landslides: Investigation and Mitigation*, Special Report No. 247, Transportation Research Board National Research Council, Washington DC, 129-177, 1996.
- 505 Thouret, J.C., Antoine, S., Magill, C., and Ollier, C.: Lahars and debris flows: Characteristics and impacts. *Earth-Science Reviews*, 201, 103003, 2020.
- Trigila A., Iadanza, C., and Spizzichino, D.: Quality assessment of the Italian Landslide Inventory using GIS processing. *Landslides*, 7, 455–470, 2010.
- 510 Vezzoli, L.: Island of Ischia, in: C.N.R., Quad. “La Ricerca Scientifica”. Consiglio Nazionale delle Ricerche, Roma, pp. 114-10, 1988.
- Vitale, S. and Isaia, R.: Fractures and faults in volcanic rocks (Campi Flegrei, southern Italy): Insight into volcano-tectonic processes. *International Journal of Earth Sciences (Geol Rundsch)*, 103(3), 801–819, 2014.
- 515 Walter, T.R., Haghshenas Haghghi, M., Schneider, F.M., Coppola, D., Motagh, M., Saul, J., Babeyko, A., Dahm, T., Troll, V.R., Tilmann, F., Heimann, S., Valade, S., Triyono, R., Khomarudin, R., Kartadinata, N., Laiolo, M., Massimetti, F., and Gaebler, P.: Complex hazard cascade culminating in the Anak Krakatau sector collapse, *Nature Communication*, 10, 4339, <https://doi.org/10.1038/s41467-019-12284-5>, 2019
- Watts, A., Peirce, C., Grevemeyer, I., Paulatto, M., Stratford, W., Bassett, D., Hunter, J., Kalnins, L., and Ronde C.D.: Rapid rates of growth and collapse of Monowai submarine volcano in the Kermadec Arc, *Nature Geosciences*, 5, 510–515, <https://doi.org/10.1038/ngeo1473>, 2012.
- 520 Williams, R., Rowley, P., and Garthwaite, M.C.: Reconstructing the Anak Krakatau flank collapse that caused the December 2018 Indonesian tsunami, *Geology*, 47(10), 973-976, 2019.
